# Supplementary material for: Vertical Infestation Profile of Aedes in Selected Urban High-Rise Residences in Malaysia
Source: MDPI journal article supplement (doi:10.3390/tropicalmed5030114), 2020-07-07
Supplement: s1 [file s1]

## Supplementary

**Table S1.** Description of the study sites.

| <b>Study site</b>                               | <b>Geographical description</b>                                   | <b>Physical description</b>                                                   |
|-------------------------------------------------|-------------------------------------------------------------------|-------------------------------------------------------------------------------|
| Subang Perdana Goodyear Court 8 (GC8)           | - 3°02'21.1"N 101°35'32.8"E<br>- located in Subang Jaya, Selangor | - medium-cost houses<br>- consists of 6 blocks, 5 floors<br>- 8 units/ floor  |
| Subang Perdana Goodyear Court 10 (GC10)         | - 3°02'10.7"N 101°35'32.5"E<br>- located in Subang Jaya, Selangor | - medium-cost houses<br>- consists of 10 blocks, 5 floors<br>- 8 units/ floor |
| Apartmen Pesona (AP)                            | - 2°58'26.0"N 101°47'58.1"E<br>- located in Kajang, Selangor      | - low-cost houses<br>- consists of 5 blocks, 5 floors<br>- 10 units/floor     |
| Flat Sri Kota (FSK)                             | - 3°05'21.0"N 101°42'50.8"E<br>- located in Cheras, Selangor      | - low-cost houses<br>- consists of 3 blocks, 17 floors<br>- 20 units/ floor   |
| PPR Taman Mulia (PTM)                           | - 3°05'24.5"N 101°42'47.8"E<br>- located in Cheras, Selangor      | - low-cost houses<br>- consists of 3 blocks, 21 floors<br>- 20 units/ floor   |
| Apartmen Sri Wangi (ASW)                        | - 1°30'37.3"N 103°40'58.0"E<br>- located in Johor Bahru, Johor    | - medium-cost houses<br>- consists of 4 blocks, 9 floors<br>- 8 units/ floor  |
| PPR Taman Kempas Permai (TKP)                   | - 1°30'49.0"N 103°42'9.8"E<br>- located in Johor Bahru, Johor     | - low-cost houses<br>- consists of 3 blocks, 17 floors<br>- 20 units/ floor   |
| Kuarters Jalan Sultan Abdul Aziz, Block A (KJA) | - 3°10'11.5"N 101°42'19.7"E<br>- located in Kuala Lumpur          | - staff quarters<br>- consists of 1 block, 19 floors<br>- 10 units/ floor     |
| Kuarters Jalan Sultan Abdul Aziz, Block C (KJC) | - 3°10'09.2"N 101°42'23.1"E<br>- located in Kuala Lumpur          | - staff quarters<br>- consists of 1 block, 6 floors<br>- 8 units/ floor       |

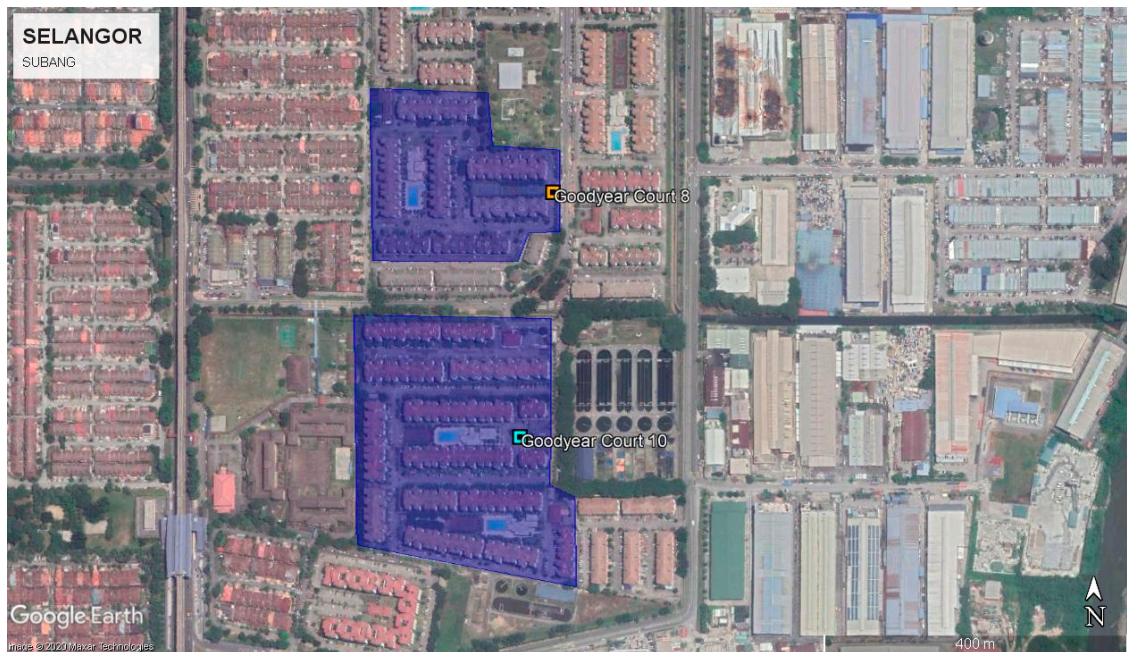

**Figure S1:** The building design of Subang Perdana Goodyear Court 8 and Goodyear Court 10.

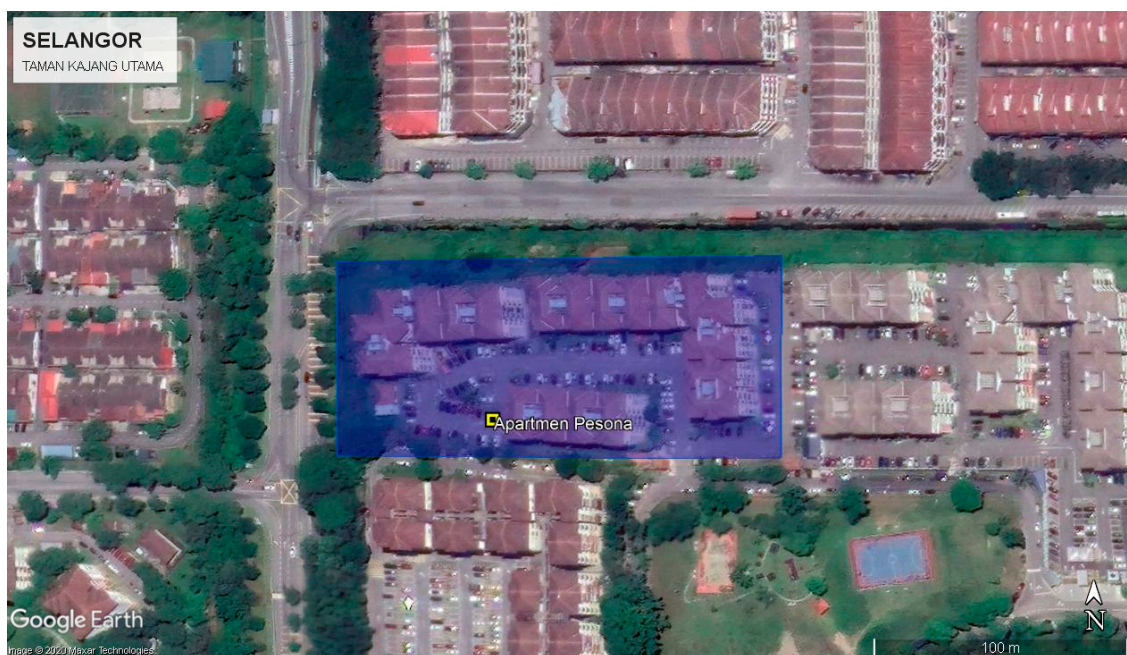

**Figure S2:** The building design of Apartmen Pesona.



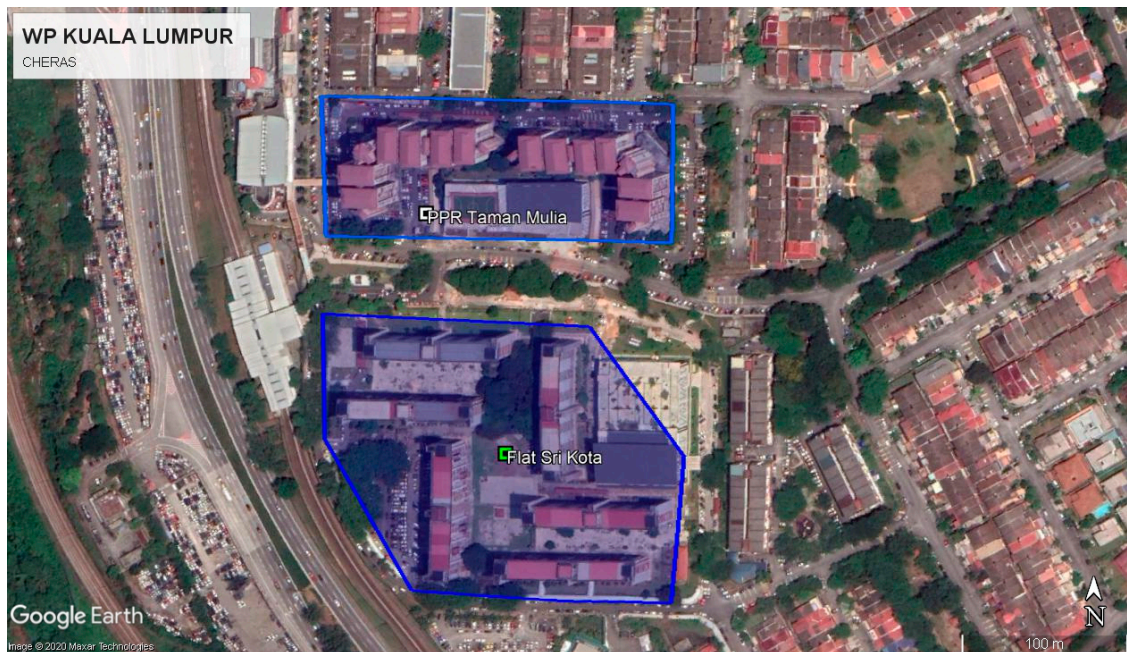

**Figure S3:** The building design of Flat Sri Kota and PPR Taman Mulia.

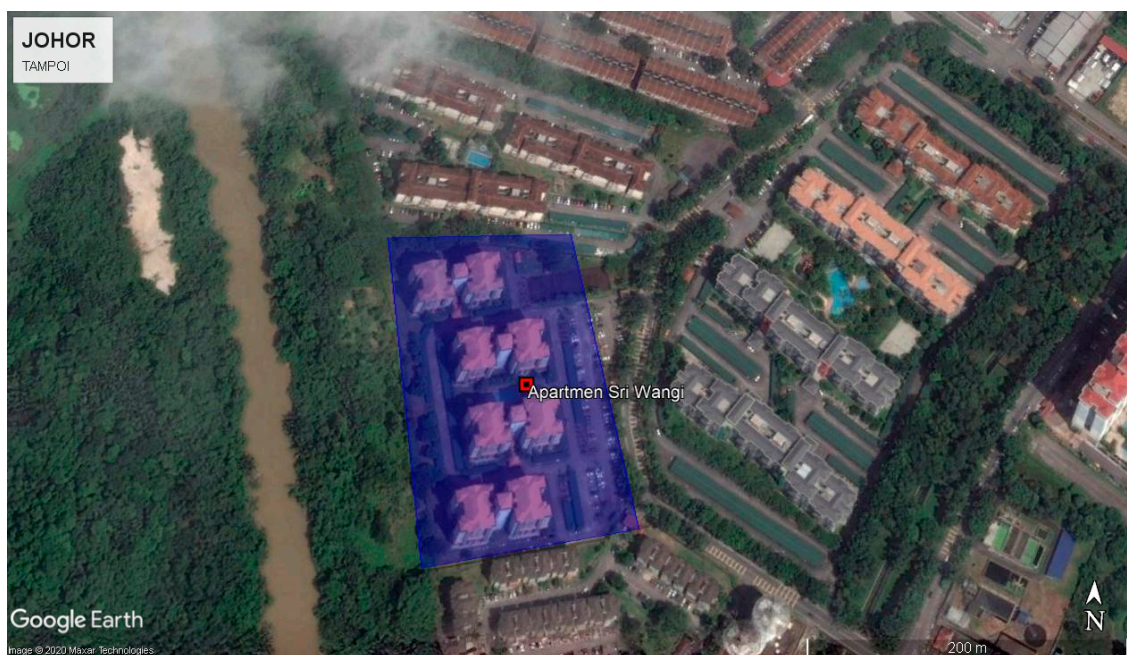

**Figure S4:** The building design of Apartmen Sri Wangi.



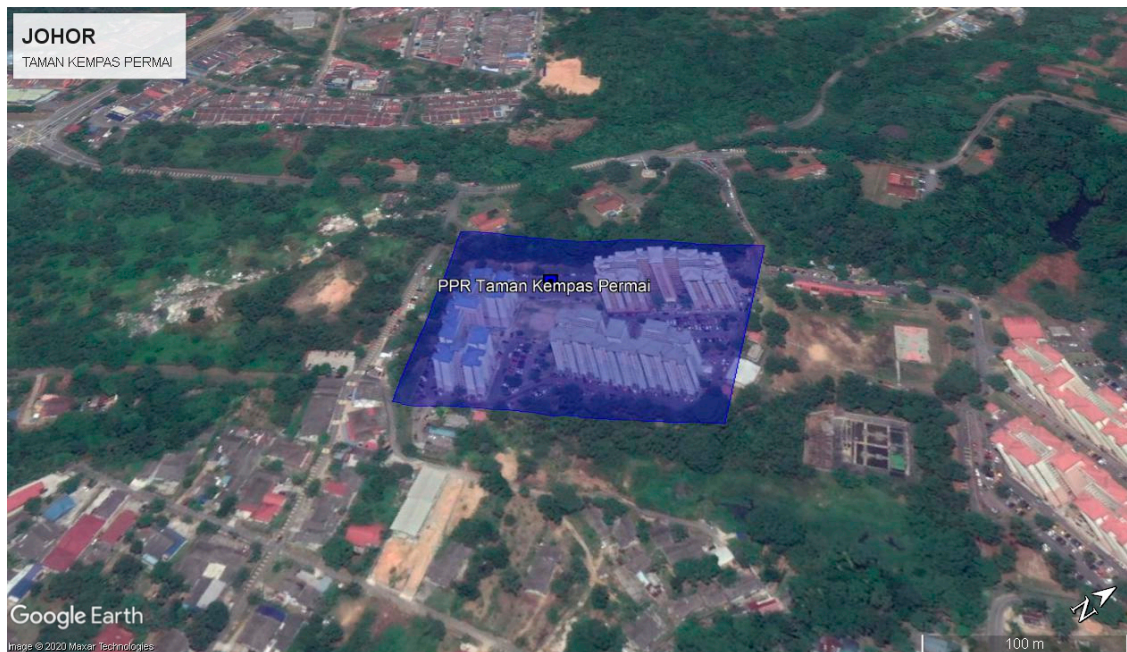

**Figure S5:** The building design of PPR Taman Kempas Permai.

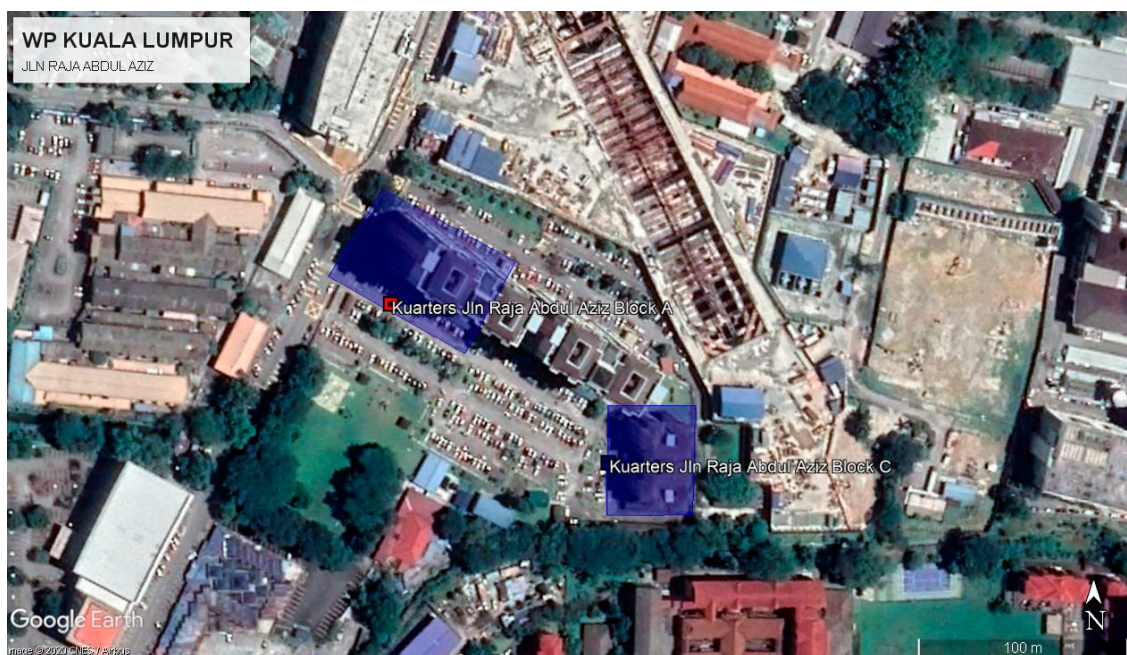

**Figure S6:** The building design of Kuarters Jalan Raja Abdul Aziz of Block A and Block C.

**Table S2:** Total number and percentage of *Aedes* spp. on each level at Kwarters Jalan Raja Abdul Aziz (Block A).

| Level | Approximate height (m) | <i>Ae. aegypti</i> |        | <i>Aedes albopictus</i> |       |
|-------|------------------------|--------------------|--------|-------------------------|-------|
|       |                        | Total larvae       | %      | Total larvae            | %     |
| 1     | 0.00 – 3.10            | 103                | 66.88  | 51                      | 33.12 |
| 2     | 3.11 – 6.20            | 50                 | 100.00 | 0                       | 0.00  |
| 3     | 6.21 – 9.30            | 100                | 89.29  | 12                      | 10.71 |
| 4     | 9.31 – 12.40           | 75                 | 100.00 | 0                       | 0.00  |
| 5     | 12.41 – 15.50          | 38                 | 100.00 | 0                       | 0.00  |
| 6     | 15.51 – 18.60          | 140                | 100.00 | 0                       | 0.00  |
| 7     | 18.61 – 21.70          | 129                | 100.00 | 0                       | 0.00  |
| 8     | 21.71 – 24.80          | 68                 | 100.00 | 0                       | 0.00  |
| 9     | 24.81 – 28.90          | 60                 | 100.00 | 0                       | 0.00  |
| 10    | 28.91 – 31.00          | 122                | 100.00 | 0                       | 0.00  |
| 11    | 31.01 – 34.10          | 82                 | 100.00 | 0                       | 0.00  |
| 12    | 34.11 – 37.20          | 91                 | 100.00 | 0                       | 0.00  |
| 13    | 37.21 – 40.30          | 120                | 100.00 | 0                       | 0.00  |
| 14    | 40.31 – 43.40          | 84                 | 100.00 | 0                       | 0.00  |
| 15    | 43.41 – 46.50          | 87                 | 100.00 | 0                       | 0.00  |
| 16    | 46.51 – 49.60          | 89                 | 100.00 | 0                       | 0.00  |
| 17    | 49.61 – 52.70          | 92                 | 100.00 | 0                       | 0.00  |
| 18    | 52.71 – 55.80          | 117                | 100.00 | 0                       | 0.00  |
| 19    | 55.81 – 58.90          | 251                | 100.00 | 0                       | 0.00  |

**Table S3:** Total number and percentage of *Aedes* spp. on each level at Kwarters Jalan Raja Abdul Aziz (Block C).

| Level | Approximate height (m) | <i>Ae. aegypti</i> |        | <i>Ae. albopictus</i> |       |
|-------|------------------------|--------------------|--------|-----------------------|-------|
|       |                        | Total larvae       | %      | Total larvae          | %     |
| 1     | 0.00 – 3.00            | 142                | 86.59  | 22                    | 13.41 |
| 2     | 3.01 – 6.00            | 131                | 88.51  | 17                    | 11.49 |
| 3     | 6.01 – 9.00            | 109                | 100.00 | 0                     | 0.00  |
| 4     | 9.01 – 12.00           | 164                | 100.00 | 0                     | 0.00  |
| 5     | 12.01 – 15.00          | 67                 | 100.00 | 0                     | 0.00  |
| 6     | 15.01 – 18.00          | 125                | 100.00 | 0                     | 0.00  |
